# Supplementary material
Source: PubMed Central journal article supplement (PMC1308900)

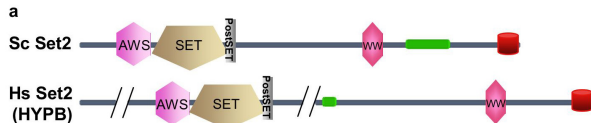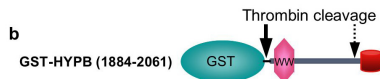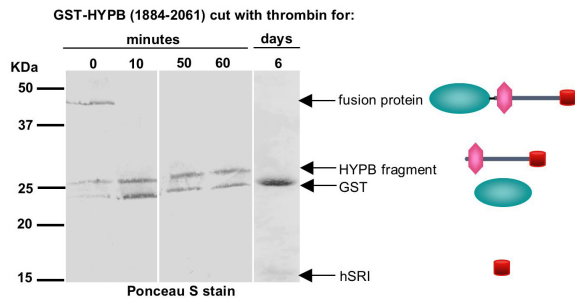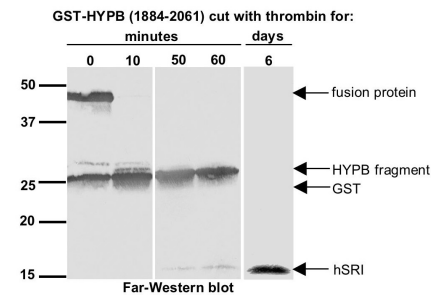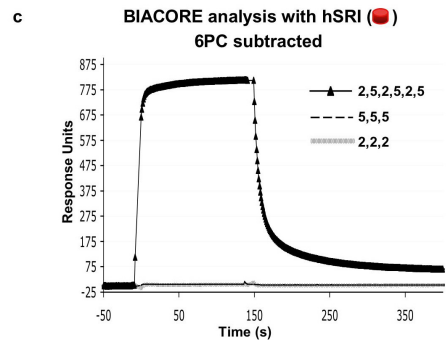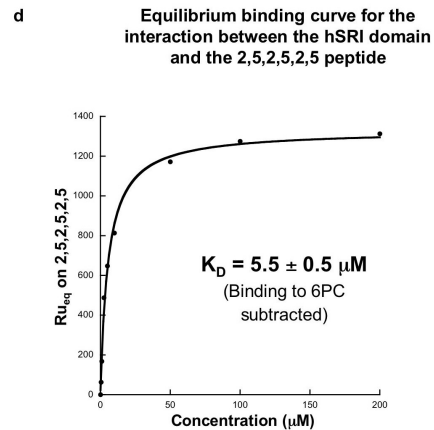

Supplement: pnas_0506350102_1.pdf [file pnas_0506350102_1.pdf]

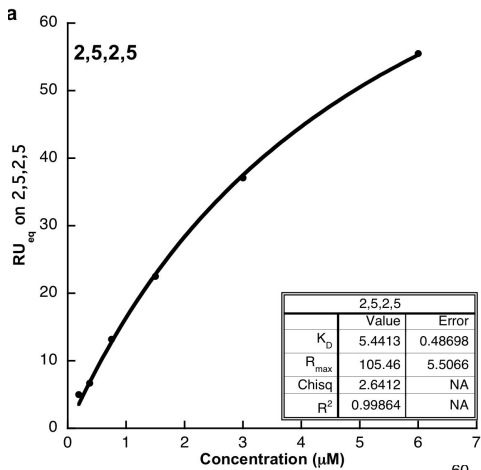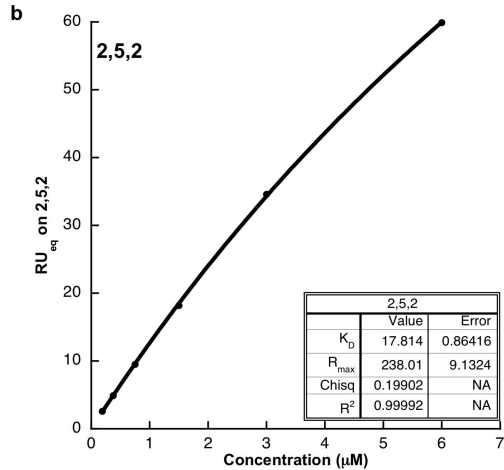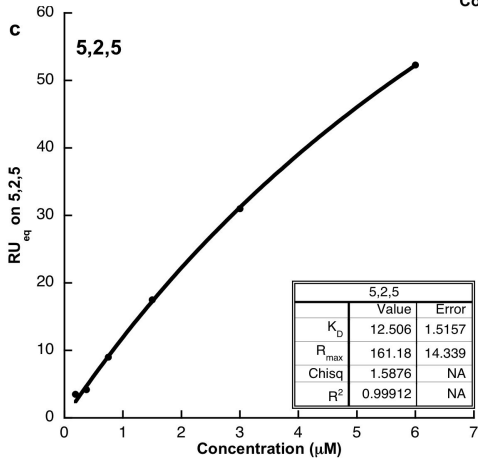

Supplement: pnas_0506350102_2.pdf [file pnas_0506350102_2.pdf]

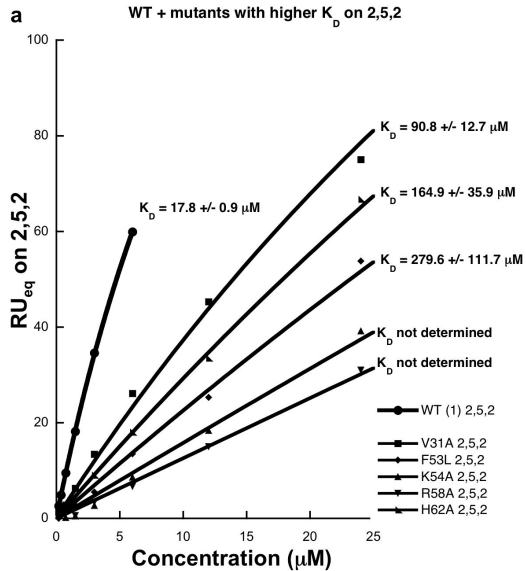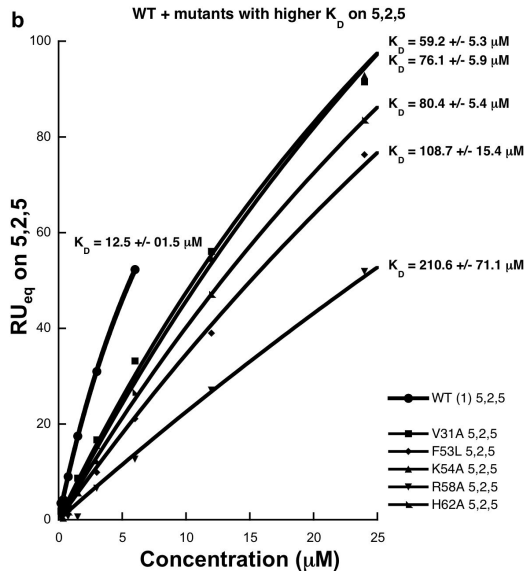

Supplement: pnas_0506350102_3.pdf [file pnas_0506350102_3.pdf]
